# Supplementary material for: Comparative Analysis of Amino Acid and Biogenic Amine Compositions of Fermented Grape Beverages
Source: MDPI journal article supplement (doi:10.3390/metabo13080892), 2023-07-27
Supplement: s1 [file s1]

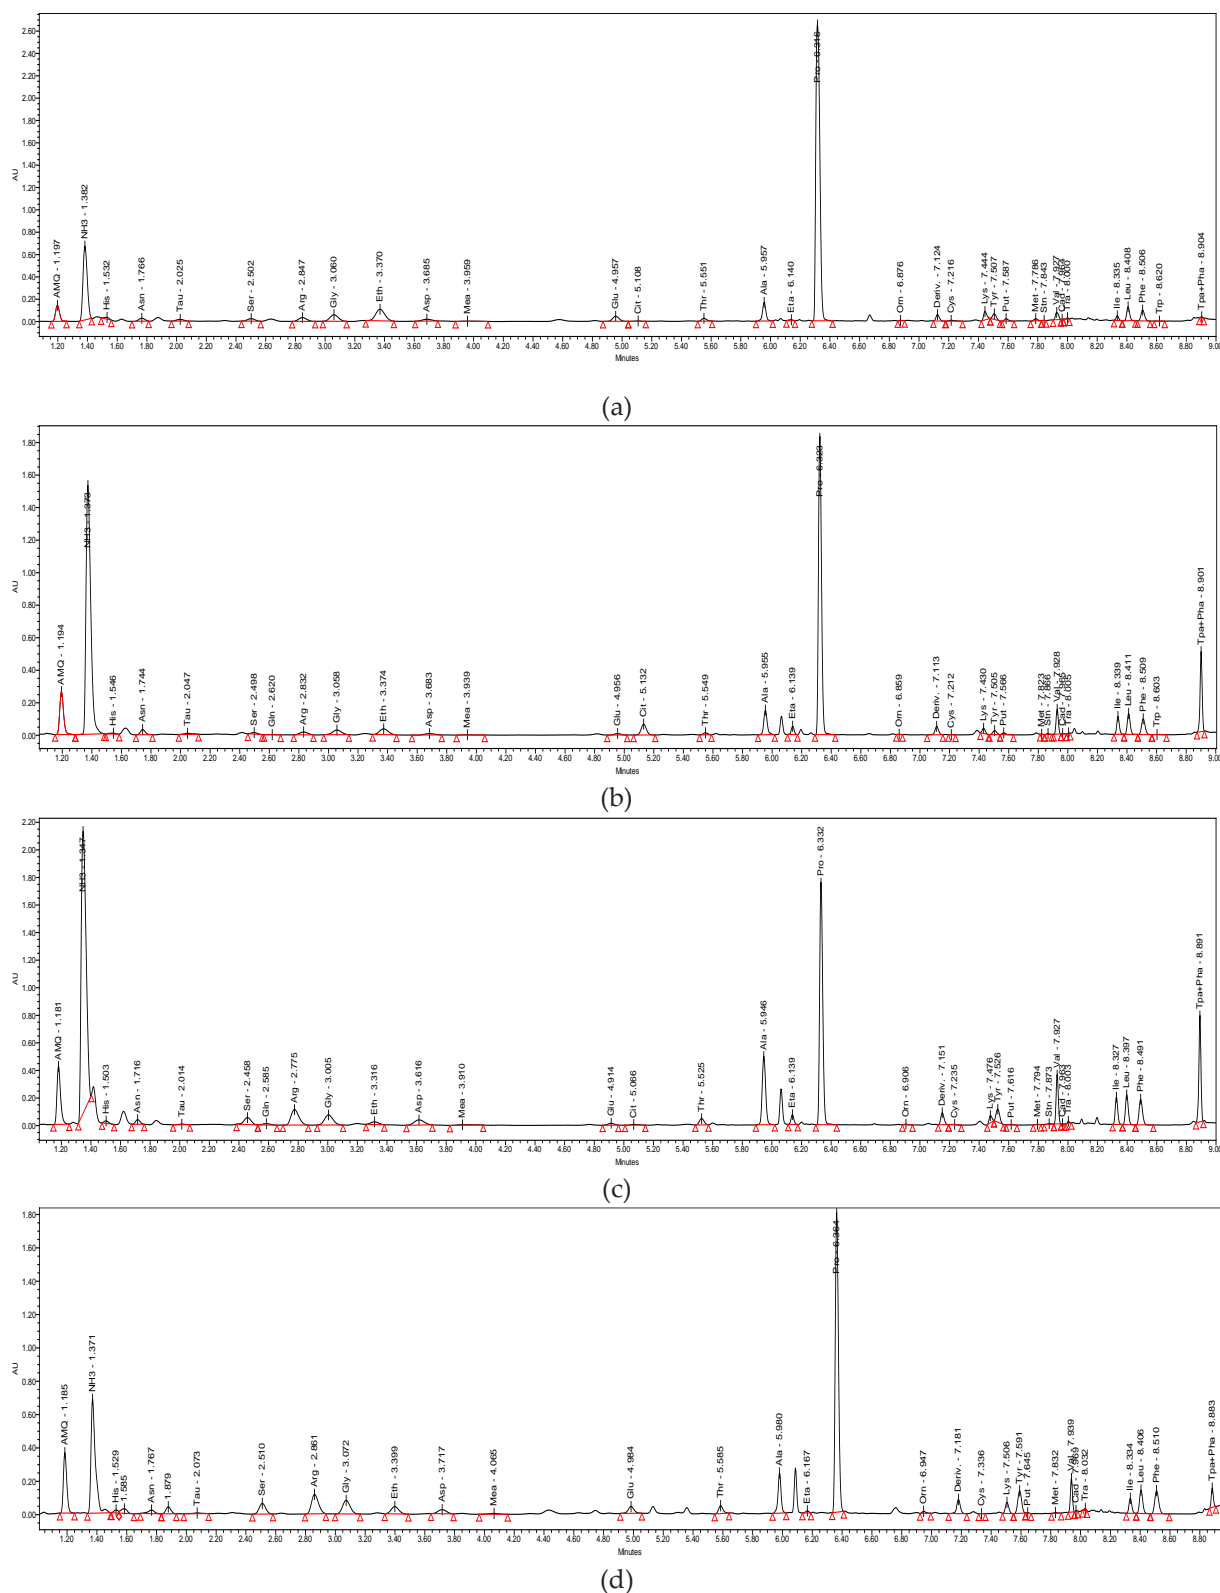

**Figure S1.** Representative chromatograms of the 33 derivatized amino acids and biogenic amines in the examined products. **(a)** Furmint; **(b)** Aszú; **(c)** Essence; **(d)** Vinegar. The  $x$  axis shows the retention time in minutes while the  $y$  axis shows the intensity in form of arbitrary units (AU) registered in the PDA detector at 260 nm. For amino acids the three-letter code was used, AMQ: 6-aminoquinoline, Tau: taurine, Hsn: histamine, Eth: ethanolamine, Mea: methylamine, Eta: ethylamine, Derivatization peak: bis-aminoquinoline urea, Put: putrescine, Stn: serotonin, Cad: cadaverine, Tra: tyramine, Tpa + Pha: tryptamine and 2-phenylethelamine.
